# Supplementary material for: Determinants and Predictors of Grief Severity and Persistence: The Rotterdam Study
Source: PubMed Central journal article supplement — J Aging Health. 2017 Jul 18;29(8):1288–307. doi: 10.1177/0898264317720715 (PMC5680907; doi:10.1177/0898264317720715), 2017-07-18
Supplement: Supplemental_tables.pdf [file Supplemental_tables.pdf]

**Supplement table A. Factors associated with grief severity (cross-sectional analysis) and grief reassessed at follow up (longitudinal analysis) – Sensitivity analyses with MDD participants excluded**

| Covariates/<br>Determinants of grief persistence        | Cross-Sectional Analyses |        |       |                | Longitudinal Analysis |        |      |                |
|---------------------------------------------------------|--------------------------|--------|-------|----------------|-----------------------|--------|------|----------------|
|                                                         | Grievers<br>N=739        |        |       |                | Grievers<br>N=456     |        |      |                |
|                                                         | B                        | 95% CI |       | <i>p</i>       | OR                    | 95% CI |      | <i>p</i>       |
| Gender (female)                                         | 1.73                     | 0.13   | 3.33  | <b>0.03</b>    | 0.70                  | 0.40   | 1.22 | 0.20           |
| Age, years                                              | -0.04                    | -0.15  | 0.06  | 0.41           | 0.99                  | 0.95   | 1.03 | 0.63           |
| Social support, score                                   | -0.21                    | -0.72  | 0.30  | 0.41           | 1.16                  | 0.95   | 1.42 | 0.14           |
| Who died?                                               |                          |        |       |                |                       |        |      |                |
| Partner (reference), %                                  | ref.                     | -      | -     | -              | ref.                  | -      | -    | -              |
| Child, %                                                | 4.07                     | 1.70   | 6.44  | <b>0.001</b>   | 1.48                  | 0.69   | 3.17 | 0.31           |
| Other, %                                                | -3.49                    | -5.02  | -1.96 | <b>≤0.0001</b> | 1.24                  | 0.73   | 2.13 | 0.43           |
| Depressive symptoms 1*, per 1 point of score            | 0.46                     | 0.35   | 0.56  | <b>≤0.0001</b> | 1.02                  | 0.98   | 1.05 | 0.30           |
| Education                                               |                          |        |       |                |                       |        |      |                |
| High (reference) ,%                                     | ref.                     | -      | -     | -              | ref.                  | -      | -    | -              |
| Middle,%                                                | 3.01                     | 0.90   | 5.13  | <b>0.005</b>   | 0.81                  | 0.42   | 1.56 | 0.53           |
| Primary,%                                               | 4.59                     | 1.65   | 7.53  | <b>0.002</b>   | 1.63.                 | 0.61   | 4.36 | 0.33           |
| Activities of daily living problems, score <sup>c</sup> | -2.42                    | -3.96  | -0.88 | <b>0.002</b>   | 0.86                  | 0.49   | 1.53 | 0.62           |
| Psycholeptics* use yes vs no(%)                         | 0.77                     | -1.07  | 2.61  | 0.41           | 1.21                  | 0.65   | 2.25 | 0.54           |
| Comorbidities <sup>§</sup> , yes vs no (%)              | -0.04                    | -1.46  | 1.39  | 0.96           | 1.46                  | 0.91   | 2.32 | 0.11           |
| Cognitive functioning, MMSE <sup>‡</sup> , - score      | -0.28                    | -0.84  | 0.29  | 0.33           | 1.08                  | 0.90   | 1.31 | 0.41           |
| Baseline value of ICG, score                            | -                        | -      | -     | -              | 1.05                  | 1.03   | 1.08 | <b>≤0.0001</b> |

\*Psycholeptics includes: benzodiazepines, antidepressants, neuroleptics and anticonvulsants

§Comorbidities includes: the prevalence of myocardial infarction, heart failure, stroke, joint problems that include osteoarthritis, rheumatoid arthritis gout, back pain and ankylosing spondylitis, chronic obstructive pulmonary disease and Diabetes mellitus

‡MMSE - The Mini-mental state examination (MMSE) test for cognitive impairment

## DETERMINANTS AND PREDICTORS OF GRIEF SEVERITY AND PERSISTENCE

**Supplement table B. Characteristics of study participants; (responders and non-responders)**

|                                                                    | <b>Responders</b><br><u>(N = 475)</u> |       | <b>Non-responders</b><br><u>(N =296)</u> |       |
|--------------------------------------------------------------------|---------------------------------------|-------|------------------------------------------|-------|
| Age, years (S.D.) <sup>b</sup>                                     | 70.0                                  | (6.5) | 77.0                                     | (7.3) |
| Gender (female), (%) <sup>a</sup>                                  | 75                                    |       | 68                                       |       |
| Education <sup>b</sup>                                             |                                       |       |                                          |       |
| Primary (%)                                                        | 8                                     |       | 16                                       |       |
| Intermediate (%)                                                   | 77                                    |       | 75                                       |       |
| High (%)                                                           | 15                                    |       | 9                                        |       |
| Depressive symptoms score (S.D.)                                   | 8.1                                   | (8.6) | 10.0                                     | (8.6) |
| Activities of daily living problems score, (S.D.) <sup>b</sup>     | 0.8                                   | (6.4) | 1.0                                      | (5.7) |
| Social support score,(S.D.)                                        | 9.4                                   | (1.3) | 9.3                                      | (1.5) |
| Diagnosed MDD, (%)                                                 | 4                                     |       | 4                                        |       |
| Who died?                                                          |                                       |       |                                          |       |
| Partner (reference), %                                             | 52                                    |       | 46                                       |       |
| Child, %                                                           | 11                                    |       | 10                                       |       |
| Other,%                                                            | 37                                    |       | 44                                       |       |
| Cognitive functioning MMSE <sup>‡</sup> score, (S.D.) <sup>b</sup> | 28.3                                  | (1.2) | 27.9                                     | (1.3) |
| Psycholeptics* use, yes (%) <sup>a</sup>                           | 17                                    |       | 24                                       |       |
| Comorbidities <sup>†</sup> , present (%) <sup>a</sup>              | 57                                    |       | 67                                       |       |

Note: Group comparisons were performed with  $\chi^2$  (categorical variables) or T-test (continuous variables) for independent-samples.

<sup>a</sup>Comparison of responding with non-responding participants (p<0.05).

<sup>b</sup>Comparison of responding with non-responding participants (p<0.0001).

Values are presented as means, standard deviation (S.D) or percentages (%)

\*Psycholeptics includes: benzodiazepines, antidepressants, neuroleptics and anticonvulsants.

<sup>†</sup>Comorbidities includes: the prevalence of MI, heart failure, stroke, joint problems that include osteoarthritis, rheumatoid arthritis, gout, back pain and ankylosing spondylitis, COPD and Diabetes mellitus

<sup>‡</sup>MMSE - The Mini-mental state examination (MMSE) test for cognitive impairment
